# Supplementary material for: In relapsed or refractory diffuse large B‐cell lymphoma, CD19 expression by immunohistochemistry alone is not a predictor of response to loncastuximab tesirine
Source: PubMed Central journal article supplement (PMC10887233; doi:10.1002/jha2.816), 2023-11-30
Supplement: JHA2-5-76-s001.pdf [file JHA2-5-76-s001.pdf]

# **In relapsed or refractory diffuse large B-cell lymphoma, CD19 expression by immunohistochemistry alone is not a predictor of response to loncastuximab tesirine**

**Running title:** CD19, QSP Modelling, and Response to Lonca

Paolo F. Caimi<sup>1</sup>, Mehdi Hamadani<sup>2</sup>, Carmelo Carlo-Stella<sup>3</sup>, Masoud Nickaeen<sup>4</sup>, Eric Jordie<sup>4</sup>, Kiersten Utsey<sup>4</sup>, Tim Knab<sup>4</sup>, Francesca Zammarchi<sup>5</sup>, Danilo Cucchi<sup>5</sup>, Serafino Pantano<sup>6</sup>, Karin Havenith<sup>5</sup>, Ying Wang<sup>7</sup>, Joseph Boni<sup>7</sup>

<sup>1</sup>Blood and Marrow Transplant Program, Taussig Cancer Institute, Cleveland Clinic Foundation, Cleveland, OH, USA; <sup>2</sup>Division of Hematology and Oncology, BMT & Cellular Therapy Program, Medical College of Wisconsin, Milwaukee, WI, USA; <sup>3</sup>Department of Biomedical Sciences, Humanitas University and Department of Hematology and Oncology, IRCCS Humanitas Research Hospital, Milan, Italy; <sup>4</sup>Metrum Research Group, Simsbury, CT, USA; <sup>5</sup>ADC Therapeutics (United Kingdom) Ltd, London, UK; <sup>6</sup>ADC Therapeutics SA, Épalinges, Switzerland; <sup>7</sup>ADC Therapeutics, Murray Hill, NJ, USA

**Correspondence:** Joseph Boni, PhD

ADC Therapeutics America, Inc.

430 Mountain Avenue, Suite 404

Murray Hill, NJ 07974 USA

E-mail: Joe.Boni@adctherapeutics.com

**Supplemental Table 1.** Prior systemic anti-cancer therapy, radiotherapy, surgery and stem cell transplant (all-treated population).

|                                                  |                     |
|--------------------------------------------------|---------------------|
|                                                  | 150 ug/kg (N = 145) |
| Prior systemic therapies* [n(%)]                 |                     |
| 2 prior lines                                    | 63 (43.4)           |
| 3 prior lines                                    | 34 (23.4)           |
| >3 prior lines                                   | 48 (33.1)           |
| Number of prior systemic therapies*              |                     |
| N                                                | 145                 |
| Mean                                             | 3.1                 |
| Std                                              | 1.29                |
| Median                                           | 3.0                 |
| Min, max                                         | 2, 7                |
| Any prior radiotherapy [n(%)]                    |                     |
| Yes                                              | 53 (36.6)           |
| No                                               | 92 (63.4)           |
| Any prior surgery [n(%)]                         |                     |
| Yes                                              | 27 (18.6)           |
| No                                               | 118 (81.4)          |
| Any prior stem cell transplant [n(%)]            |                     |
| Yes                                              | 24 (16.6)           |
| No                                               | 121 (83.4)          |
| Type of prior stem cell transplant [n(%)]        |                     |
| Allogeneic                                       | 2 (1.4)             |
| Autologous                                       | 21 (14.5)           |
| Both                                             | 1 (0.7)             |
| First line prior systemic response group [n(%)]  |                     |
| Relapse                                          | 99 (68.3)           |
| Refractory                                       | 29 (20.0)           |
| Other                                            | 17 (11.7)           |
| Last line prior systemic response group** [n(%)] |                     |
| Relapse                                          | 43 (29.7)           |
| Refractory                                       | 89 (61.4)           |
| Other                                            | 13 (9.0)            |

Note: \*Prior stem cell transplant is included. For patients who received an autologous transplant, the mobilization regimen was considered a line of therapy if it was chemotherapy-based and distinct from the other previous lines of treatment. \*\*If SCT is the most recent line, the variable is defined as response to the therapy immediately preceding SCT.

**Supplementary Table 2.** Response assessment of Hodgkin and non-Hodgkin lymphoma (Lugano Classification).

| <b>Response/site</b>                 | <b>PET-CT–based response</b>                                                                                                                                                                                                                                                                                                                                                                                                                                                                                                                                                   | <b>CT-based response</b>                                                                                                                                                                                                                                                                                                                                                                                                                              |
|--------------------------------------|--------------------------------------------------------------------------------------------------------------------------------------------------------------------------------------------------------------------------------------------------------------------------------------------------------------------------------------------------------------------------------------------------------------------------------------------------------------------------------------------------------------------------------------------------------------------------------|-------------------------------------------------------------------------------------------------------------------------------------------------------------------------------------------------------------------------------------------------------------------------------------------------------------------------------------------------------------------------------------------------------------------------------------------------------|
| <b>Complete</b>                      | <b>Complete metabolic response</b>                                                                                                                                                                                                                                                                                                                                                                                                                                                                                                                                             | <b>Complete radiologic response</b><br>(all of the following)                                                                                                                                                                                                                                                                                                                                                                                         |
| Lymph nodes and extralymphatic sites | <ul style="list-style-type: none"> <li>• Score 1, 2, or 3* with or without a residual mass on 5PS**</li> </ul> <p>Note: Uptake may be greater than normal mediastinum and/or liver in Waldeyer’s ring or extranodal sites with high physiologic uptake or with activation within spleen or marrow (e.g., with chemotherapy or myeloid colony-stimulating factors). In this circumstance, complete metabolic response may be inferred if uptake at sites of initial involvement is no greater than surrounding normal tissue even if the tissue has high physiologic uptake</p> | <ul style="list-style-type: none"> <li>• Target nodes/nodal masses must regress to <math>\leq 1.5</math> cm in LD</li> <li>• No extralymphatic sites of disease</li> </ul>                                                                                                                                                                                                                                                                            |
| Nonmeasured lesion                   | <ul style="list-style-type: none"> <li>• Not applicable</li> </ul>                                                                                                                                                                                                                                                                                                                                                                                                                                                                                                             | <ul style="list-style-type: none"> <li>• Absent</li> </ul>                                                                                                                                                                                                                                                                                                                                                                                            |
| Organ enlargement                    | <ul style="list-style-type: none"> <li>• Not applicable</li> </ul>                                                                                                                                                                                                                                                                                                                                                                                                                                                                                                             | <ul style="list-style-type: none"> <li>• Regress to normal</li> </ul>                                                                                                                                                                                                                                                                                                                                                                                 |
| New lesions                          | <ul style="list-style-type: none"> <li>• None</li> </ul>                                                                                                                                                                                                                                                                                                                                                                                                                                                                                                                       | <ul style="list-style-type: none"> <li>• None</li> </ul>                                                                                                                                                                                                                                                                                                                                                                                              |
| Bone marrow                          | <ul style="list-style-type: none"> <li>• No evidence of FDG-avid disease in marrow</li> </ul>                                                                                                                                                                                                                                                                                                                                                                                                                                                                                  | <ul style="list-style-type: none"> <li>• Normal by morphology; if indeterminate, IHC negative</li> </ul>                                                                                                                                                                                                                                                                                                                                              |
| <b>Partial</b>                       | <b>Partial metabolic response</b>                                                                                                                                                                                                                                                                                                                                                                                                                                                                                                                                              | <b>Partial remission</b><br>(all of the following)                                                                                                                                                                                                                                                                                                                                                                                                    |
| Lymph nodes and extralymphatic sites | <ul style="list-style-type: none"> <li>• Score 4 or 5** with reduced uptake compared with baseline and residual mass(es) of any size</li> <li>• At interim, these findings suggest responding disease</li> <li>• At end of treatment, these findings indicate residual disease</li> </ul>                                                                                                                                                                                                                                                                                      | <ul style="list-style-type: none"> <li>• <math>\geq 50\%</math> decrease in SPD of up to 6 target measurable nodes and extranodal sites</li> <li>• When a lesion is too small to measure on CT, assign <math>5 \times 5</math> mm as the default value</li> <li>• When no longer visible, <math>0 \times 0</math> mm</li> <li>• For a node <math>&gt;5 \times 5</math> mm, but smaller than normal, use actual measurement for calculation</li> </ul> |
| Nonmeasured lesion                   | <ul style="list-style-type: none"> <li>• Not applicable</li> </ul>                                                                                                                                                                                                                                                                                                                                                                                                                                                                                                             | <ul style="list-style-type: none"> <li>• Absent/normal, regressed, but no increase</li> </ul>                                                                                                                                                                                                                                                                                                                                                         |
| Organ enlargement                    | <ul style="list-style-type: none"> <li>• Not applicable</li> </ul>                                                                                                                                                                                                                                                                                                                                                                                                                                                                                                             | <ul style="list-style-type: none"> <li>• Spleen must have regressed by <math>&gt;50\%</math> in length beyond normal</li> </ul>                                                                                                                                                                                                                                                                                                                       |
| New lesions                          | <ul style="list-style-type: none"> <li>• None</li> </ul>                                                                                                                                                                                                                                                                                                                                                                                                                                                                                                                       | <ul style="list-style-type: none"> <li>• None</li> </ul>                                                                                                                                                                                                                                                                                                                                                                                              |

| <b>Response/site</b>                          | <b>PET-CT–based response</b>                                                                                                                                                                                                                                                                                                                                                                              | <b>CT-based response</b>                                                                                                                                                                                                                                                                                                                                                                                                                                                                                                                                                                                          |
|-----------------------------------------------|-----------------------------------------------------------------------------------------------------------------------------------------------------------------------------------------------------------------------------------------------------------------------------------------------------------------------------------------------------------------------------------------------------------|-------------------------------------------------------------------------------------------------------------------------------------------------------------------------------------------------------------------------------------------------------------------------------------------------------------------------------------------------------------------------------------------------------------------------------------------------------------------------------------------------------------------------------------------------------------------------------------------------------------------|
| Bone marrow                                   | <ul style="list-style-type: none"> <li>Residual uptake higher than uptake in normal marrow but reduced compared with baseline (diffuse uptake compatible with reactive changes from chemotherapy allowed). If there are persistent focal changes in the marrow in the context of a nodal response, consideration should be given for further evaluation with MRI or biopsy or an interval scan</li> </ul> | <ul style="list-style-type: none"> <li>Not applicable</li> </ul>                                                                                                                                                                                                                                                                                                                                                                                                                                                                                                                                                  |
| <b>No response or stable disease</b>          | <b>No metabolic response</b>                                                                                                                                                                                                                                                                                                                                                                              | <b>Stable disease</b>                                                                                                                                                                                                                                                                                                                                                                                                                                                                                                                                                                                             |
| Target nodes/nodal masses, extranodal lesions | <ul style="list-style-type: none"> <li>Score 4 or 5 with no significant change in FDG uptake from baseline at interim or end of treatment</li> </ul>                                                                                                                                                                                                                                                      | <ul style="list-style-type: none"> <li>&lt;50% decrease from baseline in SPD of up to 6 dominant, measurable nodes and extranodal sites; no criteria for progressive disease are met</li> </ul>                                                                                                                                                                                                                                                                                                                                                                                                                   |
| Nonmeasured lesions                           | <ul style="list-style-type: none"> <li>Not applicable</li> </ul>                                                                                                                                                                                                                                                                                                                                          | <ul style="list-style-type: none"> <li>No increase consistent with progression</li> </ul>                                                                                                                                                                                                                                                                                                                                                                                                                                                                                                                         |
| Organ enlargement                             | <ul style="list-style-type: none"> <li>Not applicable</li> </ul>                                                                                                                                                                                                                                                                                                                                          | <ul style="list-style-type: none"> <li>No increase consistent with progression</li> </ul>                                                                                                                                                                                                                                                                                                                                                                                                                                                                                                                         |
| New lesions                                   | <ul style="list-style-type: none"> <li>None</li> </ul>                                                                                                                                                                                                                                                                                                                                                    | <ul style="list-style-type: none"> <li>None</li> </ul>                                                                                                                                                                                                                                                                                                                                                                                                                                                                                                                                                            |
| Bone marrow                                   | <ul style="list-style-type: none"> <li>No change from baseline</li> </ul>                                                                                                                                                                                                                                                                                                                                 | <ul style="list-style-type: none"> <li>Not applicable</li> </ul>                                                                                                                                                                                                                                                                                                                                                                                                                                                                                                                                                  |
| <b>Progressive disease</b>                    | <b>Progressive metabolic disease</b>                                                                                                                                                                                                                                                                                                                                                                      | <b>Progressive disease (requires at least 1 of the following)</b>                                                                                                                                                                                                                                                                                                                                                                                                                                                                                                                                                 |
| Individual target nodes/nodal masses          | <ul style="list-style-type: none"> <li>Score 4 or 5 with an increase in intensity of uptake from baseline and/or</li> </ul>                                                                                                                                                                                                                                                                               | <ul style="list-style-type: none"> <li>PPD progression</li> </ul>                                                                                                                                                                                                                                                                                                                                                                                                                                                                                                                                                 |
| Extranodal lesions                            | <ul style="list-style-type: none"> <li>New FDG-avid foci consistent with lymphoma at interim or end of treatment assessment</li> </ul>                                                                                                                                                                                                                                                                    | <p>An individual node/lesion must be abnormal with the following:</p> <ul style="list-style-type: none"> <li>LDi &gt; 1.5 cm and</li> <li>Increase by ≥50% from PPD nadir and</li> <li>An increase in LDi or SDi from nadir<br/>0.5 cm for lesions ≤ 2 cm<br/>1.0 cm for lesions &gt; 2 cm</li> <li>In the setting of splenomegaly, the splenic length must increase by &gt; 50% of the extent of its prior increase beyond baseline (e.g., a 15-cm spleen must increase to &gt; 16 cm). If no prior splenomegaly, must increase by at least 2 cm from baseline</li> <li>New or recurrent splenomegaly</li> </ul> |

| <b>Response/site</b> | <b>PET-CT–based response</b>                                                                                                                                                                                                                           | <b>CT-based response</b>                                                                                                                                                                                                                                                                                                                                                               |
|----------------------|--------------------------------------------------------------------------------------------------------------------------------------------------------------------------------------------------------------------------------------------------------|----------------------------------------------------------------------------------------------------------------------------------------------------------------------------------------------------------------------------------------------------------------------------------------------------------------------------------------------------------------------------------------|
| Nonmeasured lesions  | <ul style="list-style-type: none"> <li>• None</li> </ul>                                                                                                                                                                                               | <ul style="list-style-type: none"> <li>• New or clear progression of preexisting nonmeasured lesions</li> </ul>                                                                                                                                                                                                                                                                        |
| New lesions          | <ul style="list-style-type: none"> <li>• New FDG-avid foci consistent with lymphoma rather than another etiology (e.g., infection, inflammation). If uncertain regarding etiology of new lesions, biopsy or interval scan may be considered</li> </ul> | <ul style="list-style-type: none"> <li>• Regrowth of previously resolved lesions</li> <li>• A new node &gt; 1.5 cm in any axis</li> <li>• A new extranodal site &gt; 1.0 cm in any axis; if &lt; 1.0 cm in any axis, its presence must be unequivocal and must be attributable to lymphoma</li> <li>• Assessable disease of any size unequivocally attributable to lymphoma</li> </ul> |
| Bone marrow          | <ul style="list-style-type: none"> <li>• New or recurrent FDG-avid foci</li> </ul>                                                                                                                                                                     | <ul style="list-style-type: none"> <li>• New or recurrent involvement</li> </ul>                                                                                                                                                                                                                                                                                                       |

Abbreviations: 5PS, 5-point scale; CT, computed tomography; FDG, fluorodeoxyglucose; IHC, immunohistochemistry; LDi, longest transverse diameter of a lesion; MRI, magnetic resonance imaging; PET, positron emission tomography; PPD, cross product of the LDi and perpendicular diameter; SDi, shortest axis perpendicular to the LDi; SPD, sum of the product of the perpendicular diameters for multiple lesions.

\*A score of 3 in many patients indicates a good prognosis with standard treatment, especially if at the time of an interim scan. However, in trials involving PET where de-escalation is investigated, it may be preferable to consider a score of 3 as inadequate response (to avoid undertreatment). Measured dominant lesions: up to six of the largest dominant nodes, nodal masses and extranodal lesions selected to be clearly measurable in two diameters. Nodes should preferably be from disparate regions of the body and should include, where applicable, mediastinal and retroperitoneal areas. Non-nodal lesions include those in solid organs (e.g., liver, spleen, kidneys and lungs), GI involvement, cutaneous lesions or those noted on palpation. Nonmeasured lesions: any disease not selected as measured; dominant disease and truly assessable disease should be considered not measured. These sites include any nodes, nodal masses and extranodal sites not selected as dominant or measurable or that do not meet the requirements for measurability but are still considered abnormal, as well as truly assessable disease, which is any site of suspected disease that would be difficult to follow quantitatively with measurement, including pleural effusions, ascites, bone lesions, leptomeningeal disease, abdominal masses and other lesions that cannot be confirmed and followed by imaging. In Waldeyer’s ring or in extranodal sites (e.g., GI tract, liver and bone marrow), FDG uptake may be greater than in the mediastinum with complete metabolic response but should be no higher than surrounding normal physiologic uptake (e.g., with marrow activation as a result of chemotherapy or myeloid growth factors).

\*\* PET 5PS: 1, no uptake above background; 2, uptake ≤ mediastinum; 3, uptake > mediastinum but ≤ liver; 4, uptake moderately > liver; 5, uptake markedly higher than liver and/or new lesions; X, new areas of uptake unlikely to be related to lymphoma.

Reference: Cheson BD, Fisher RI, Barrington SF, et al. Recommendations for initial evaluation, staging and response assessment of Hodgkin and non-Hodgkin lymphoma: The Lugano classification. *J Clin Oncol* 2014;32(27):3059-3067.

**Supplementary Table 3.** Quantitative systems pharmacology model parameters, values and source information. Unless otherwise noted, the model structure, equations and parameterization are as found in Jones et al. 2019 (Jones HM, Zhang Z, Jasper P, Luo H, Avery LB, King LE, *et al.* A physiologically-based pharmacokinetic model for the prediction of monoclonal antibody pharmacokinetics from in vitro data. *CPT Pharmacometrics Syst Pharmacol.* 2019; **8**[10]: 738–47. doi: 10.1002/psp4.12461).

| Parameter    | Definition                                                                | Value(s)         | Unit     | Source                                                                                                                                                                                                                                                                |
|--------------|---------------------------------------------------------------------------|------------------|----------|-----------------------------------------------------------------------------------------------------------------------------------------------------------------------------------------------------------------------------------------------------------------------|
| FcRn_Conc    | FcRn expression level                                                     | 22.0465 - 44.093 | uM       | Upper bound from <a href="https://ascpt.onlinelibrary.wiley.com/doi/10.1002/psp4.12461">https://ascpt.onlinelibrary.wiley.com/doi/10.1002/psp4.12461</a> ; HA patients simulated with a lower levels<br>Lower bound assumes a 107 h doubling time (typical value from |
| mu           | CD19+ tumor cell growth rate                                              | 0.0065 - 0.0195  | 1/h      | <a href="https://link.springer.com/article/10.1016/j.bulm.2004.06.007">https://link.springer.com/article/10.1016/j.bulm.2004.06.007</a> ); DH/TH patients simulated with faster rates<br>Lower bound assumes a 107h doubling time (typical value from                 |
| mu_n         | CD19-/low tumor cell growth rate                                          | 0.0065 - 0.0195  | 1/h      | <a href="https://link.springer.com/article/10.1016/j.bulm.2004.06.007">https://link.springer.com/article/10.1016/j.bulm.2004.06.007</a> ); DH/TH patients simulated with faster rates                                                                                 |
| cd19_exp_tum | Ratio of CD19+ tumor cells to total tumor cells in tumor tissue           | 0.01 - 1.0       | unitless | Informed by IHC data, default value was 0.9                                                                                                                                                                                                                           |
| Rn0          | Number of CD19 antigens per CD19-/low cell                                | 1 - 10           | unitless | Values chosen to be low/undetectable                                                                                                                                                                                                                                  |
| R0           | Number of CD19 antigens per CD19+ cell                                    | 100 - 21000      | unitless | Median value taken from Fig 4. in <a href="https://acsjournals.onlinelibrary.wiley.com/doi/10.1002/ncr.33796">https://acsjournals.onlinelibrary.wiley.com/doi/10.1002/ncr.33796</a>                                                                                   |
| K_D          | CD19-ADC dissociation constant                                            | 2.06E-04         | uM       | Fit to data from <a href="https://onlinelibrary.wiley.com/doi/full/10.1111/j.1365-2141.2007.06883.x?sid=nlm%3Apubmed">https://onlinelibrary.wiley.com/doi/full/10.1111/j.1365-2141.2007.06883.x?sid=nlm%3Apubmed</a>                                                  |
| k_on         | CD19-ADC complex formation rate constant                                  | 2934             | 1/uM/h   | Fit to data from <a href="https://onlinelibrary.wiley.com/doi/full/10.1111/j.1365-2141.2007.06883.x?sid=nlm%3Apubmed">https://onlinelibrary.wiley.com/doi/full/10.1111/j.1365-2141.2007.06883.x?sid=nlm%3Apubmed</a>                                                  |
| k_e          | Endocytosis rate constant                                                 | 0.165            | 1/h      | Fit to data from <a href="https://onlinelibrary.wiley.com/doi/full/10.1111/j.1365-2141.2007.06883.x?sid=nlm%3Apubmed">https://onlinelibrary.wiley.com/doi/full/10.1111/j.1365-2141.2007.06883.x?sid=nlm%3Apubmed</a>                                                  |
| k_deg        | Rate constant for lysosomal degradation and intracellular payload release | 1.137            | 1/h      | Fit to data from <a href="https://onlinelibrary.wiley.com/doi/full/10.1111/j.1365-2141.2007.06883.x?sid=nlm%3Apubmed">https://onlinelibrary.wiley.com/doi/full/10.1111/j.1365-2141.2007.06883.x?sid=nlm%3Apubmed</a>                                                  |
| k_out        | Rate constant for                                                         | 0.05             | 1/h      | Typical value from <a href="https://jpet.aspetjournals.org/content/374/1/184">https://jpet.aspetjournals.org/content/374/1/184</a>                                                                                                                                    |

|              |                                                                     |          |              |                                                                                                                                                                                                                                        |  |
|--------------|---------------------------------------------------------------------|----------|--------------|----------------------------------------------------------------------------------------------------------------------------------------------------------------------------------------------------------------------------------------|--|
|              | payload leaving the cell via diffusion                              |          |              |                                                                                                                                                                                                                                        |  |
|              | Rate constant of payload entering the cell via diffusion            |          |              |                                                                                                                                                                                                                                        |  |
| k_in         | Tumor cell radius                                                   | 0.5      | 1/h          | Typical value from <a href="https://jpet.aspetjournals.org/content/374/1/184">https://jpet.aspetjournals.org/content/374/1/184</a>                                                                                                     |  |
| r            | Payload cytotoxicity IC50 value for CD19+ cells                     | 5.00E-06 | um           | Internal data                                                                                                                                                                                                                          |  |
| PBD_IC50     | Payload cytotoxicity IC50 for CD19-/low cells                       | 1.59E-04 | uM           | Internal data                                                                                                                                                                                                                          |  |
| PBD_IC50_n   | Drug-antibody ratio                                                 | 2.55E-04 | nM           | Internal data                                                                                                                                                                                                                          |  |
| DAR          | Death rate of tumor cells                                           | 2.3      | unitless     | From <a href="https://ashpublications.org/blood/article/131/10/1094/36428/ADCT-402-a-PBD-dimer-containing-antibody-drug">https://ashpublications.org/blood/article/131/10/1094/36428/ADCT-402-a-PBD-dimer-containing-antibody-drug</a> |  |
| k_death      | Death rate of transit cells                                         | 0.051    | 1/h          | Fit to internal tumor growth inhibition data                                                                                                                                                                                           |  |
| k_trans      | Ratio of CD21 to CD19 antigens on tumor cell surface                | 0.001    | 1/h          | Fit to internal tumor growth inhibition data                                                                                                                                                                                           |  |
| CD21Factor   | CD21-CD19-ADC complex formation rate constant                       | 2.515    | unitless     | From <a href="https://onlinelibrary.wiley.com/doi/10.1111/j.1365-2141.2007.06883.x">https://onlinelibrary.wiley.com/doi/10.1111/j.1365-2141.2007.06883.x</a>                                                                           |  |
| k_on21       | CD21-CD19-ADC complex dissociation rate constant                    | 9.16E-05 | 1/(#/cell)/h | Fit to data from <a href="https://onlinelibrary.wiley.com/doi/full/10.1111/j.1365-2141.2007.06883.x?sid=nlm%3Apubmed">https://onlinelibrary.wiley.com/doi/full/10.1111/j.1365-2141.2007.06883.x?sid=nlm%3Apubmed</a>                   |  |
| k_off21      | Elimination rate constant of the payload in the extracellular space | 3.24E-05 | 1/h          | Fit to data from <a href="https://onlinelibrary.wiley.com/doi/full/10.1111/j.1365-2141.2007.06883.x?sid=nlm%3Apubmed">https://onlinelibrary.wiley.com/doi/full/10.1111/j.1365-2141.2007.06883.x?sid=nlm%3Apubmed</a>                   |  |
| k_el_payload |                                                                     | 0.693    | 1/h          | Assumed half-life of payload in plasma is ~1h <a href="https://pubmed.ncbi.nlm.nih.gov/29992976/">https://pubmed.ncbi.nlm.nih.gov/29992976/</a>                                                                                        |  |

| ACSINS_score<br><b>Variable</b> | AC-SINS<br>score of the<br>mAb<br><b>Definition</b>                                        | 6 | unitless | Fit to internal data | <b>Unit</b> |
|---------------------------------|--------------------------------------------------------------------------------------------|---|----------|----------------------|-------------|
| R_nm                            | Number of free surface receptors (CD19) per CD19+ tumor cell                               |   |          |                      | #/cell      |
| C_nm                            | Number of ADC-CD19 complexes per surface of CD19+ tumor cell                               |   |          |                      | #/cell      |
| I_nm                            | Number of internalized ADC-CD19 complexes per CD19+ tumor cell                             |   |          |                      | #/cell      |
| De_nm                           | Number of degraded ADCs per CD19+ tumor cell                                               |   |          |                      | #/cell      |
| R21_nm                          | Number of free surface receptors (CD21) per CD19+ tumor cell                               |   |          |                      | #/cell      |
| CRR21_xnm                       | Number of CD19-CD21-ADC complexes per CD19+ tumor cell                                     |   |          |                      | #/cell      |
| Rn_xnm                          | Number of free surface receptors (CD19) per CD19-/low tumor cell                           |   |          |                      | #/cell      |
| Cn_xnm                          | Number of ADC-CD19 complexes per surface of CD19-/low tumor cell                           |   |          |                      | #/cell      |
| In_xnm                          | Number of internalized ADC-CD19 complexes per CD19-/low tumor cell                         |   |          |                      | #/cell      |
| Den_xnm                         | Number of degraded ADCs per CD19-/low tumor cell                                           |   |          |                      | #/cell      |
| R21n_xnm                        | Number of free surface receptors (CD21) per CD19-/low tumor cell                           |   |          |                      | #/cell      |
| CRR21n_xnm                      | Number of CD19-CD21-ADC complexes per CD19-/low tumor cell                                 |   |          |                      | #/cell      |
| N_nm                            | Number of CD19+ tumor cells                                                                |   |          |                      | #           |
| Nn_nm                           | Number of CD19-/low tumor cells                                                            |   |          |                      | #           |
| Dm_nm                           | Concentration of payload in the tumor interstitial space                                   |   |          |                      | uM          |
| Nd_xnm                          | Number of CD19+ transit cells                                                              |   |          |                      | #           |
| Nnd_xnm                         | Number of CD19-/low transit cells                                                          |   |          |                      | #           |
| Tumor_Volume                    | Tumor volume (calculated from sum of tumor cells, assuming tumor has cellularity of 0.375) |   |          |                      | L           |



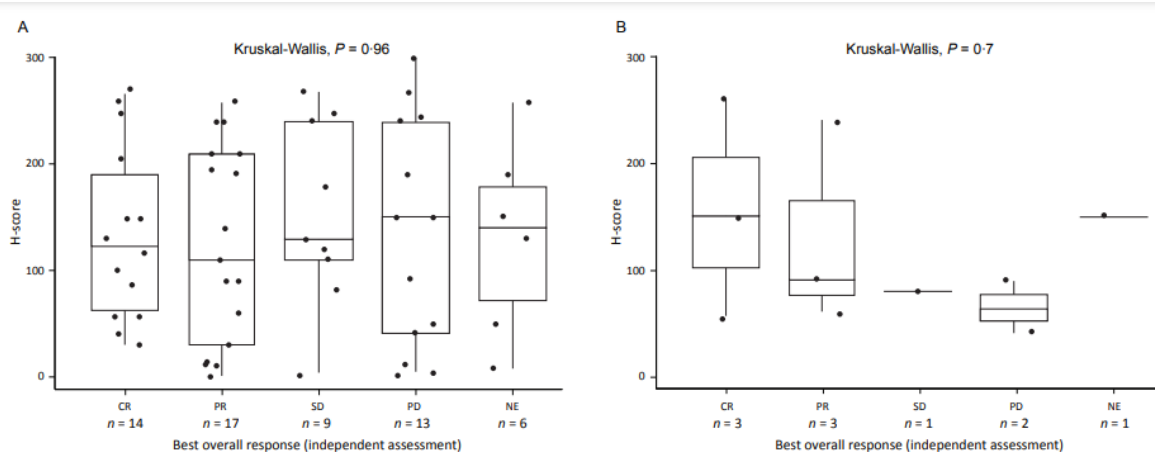

**Supplementary Fig S1.** Baseline tumour CD19-positive H-score by response category (independent assessment). (A) Immunohistochemistry analysis of biopsy samples from patients enrolled in the LOTIS-2 study, with biopsies that were collected after the last systemic therapy and before Lonca treatment ( $n = 59$ ) and (B) from patients after CAR-T therapy ( $n = 10$ ). CAR-T, chimeric antigen receptor T-cell; CR, complete response; H-score, histoscore; NE, not evaluable; PD, progressive disease; PR, partial response; SD, stable disease.

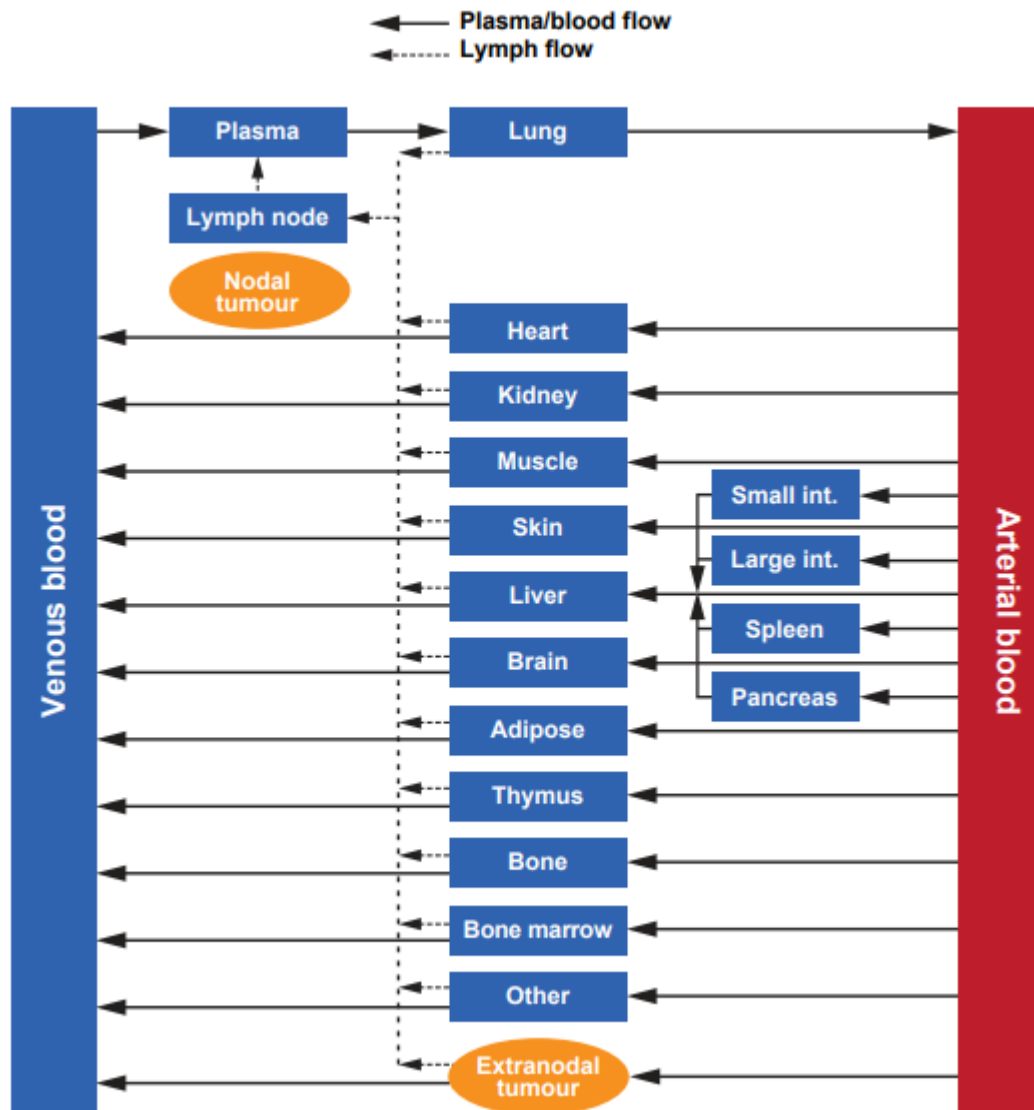

**Supplementary Fig S2.** Quantitative systems pharmacology model schematic. This model has been extended to include nodal and extranodal tumour compartments. (Adapted from Jones HM, Zhang Z, Jasper P, Luo H, Avery LB, King LE, *et al.* A physiologically-based pharmacokinetic model for the prediction of monoclonal antibody pharmacokinetics from in vitro data. *CPT Pharmacometrics Syst Pharmacol.* 2019; **8**[10]: 738–47. doi: 10.1002/psp4.12461)

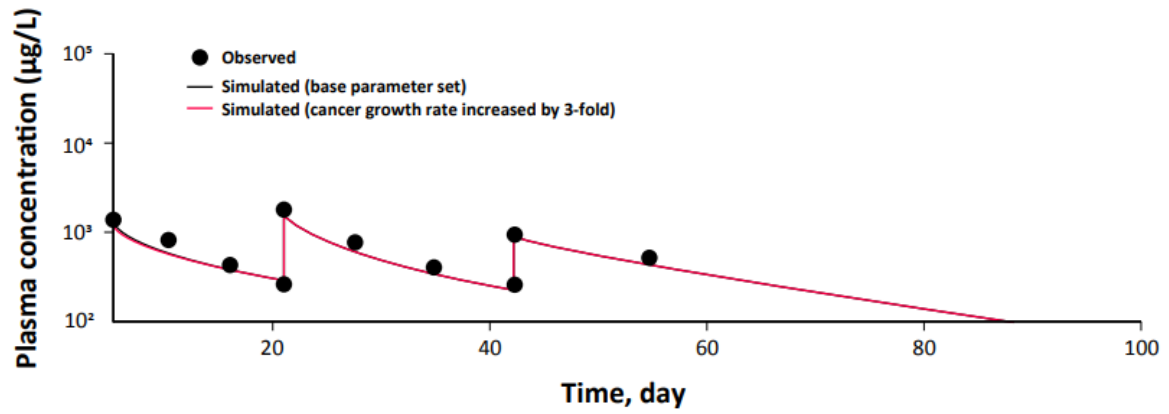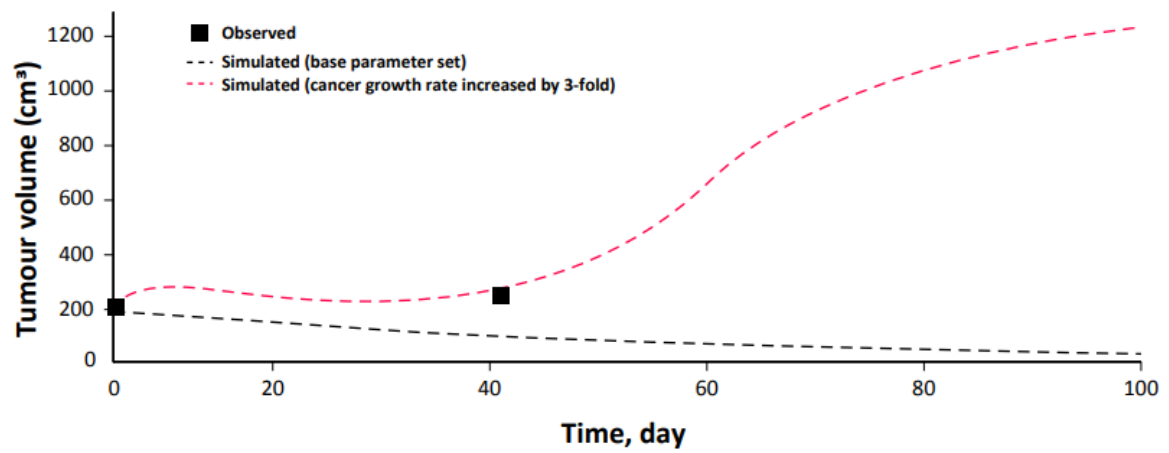

**Supplementary Fig 3.** Quantitative systems pharmacology modelling indicated that the faster growth rate of double-hit lymphomas explained the observed lack of response to Lonca, despite high CD19 positivity as measured by IHC. The example patient had a body weight of 122 kg and had double-hit lymphoma; the IHC of the biopsy showed that 95% of cells were CD19 positive. IHC, immunohistochemistry; Lonca, loncastuximab tesirine-lpyl.

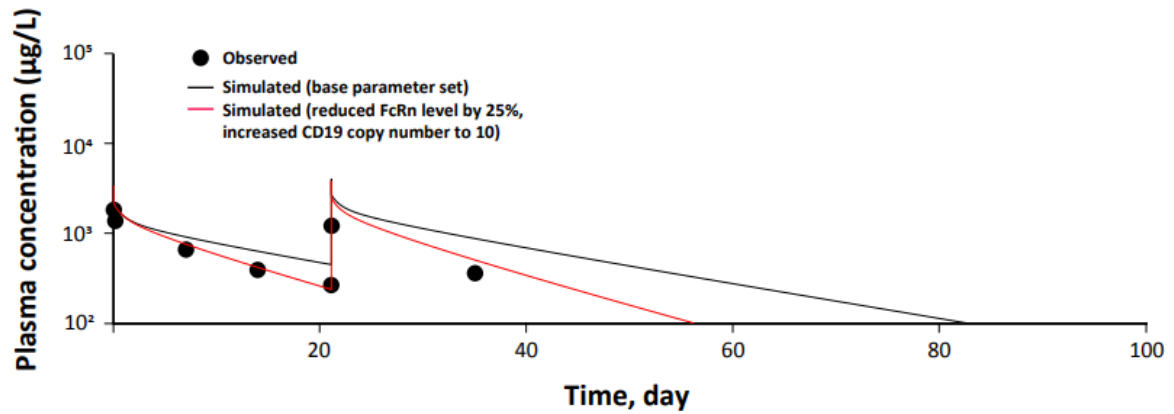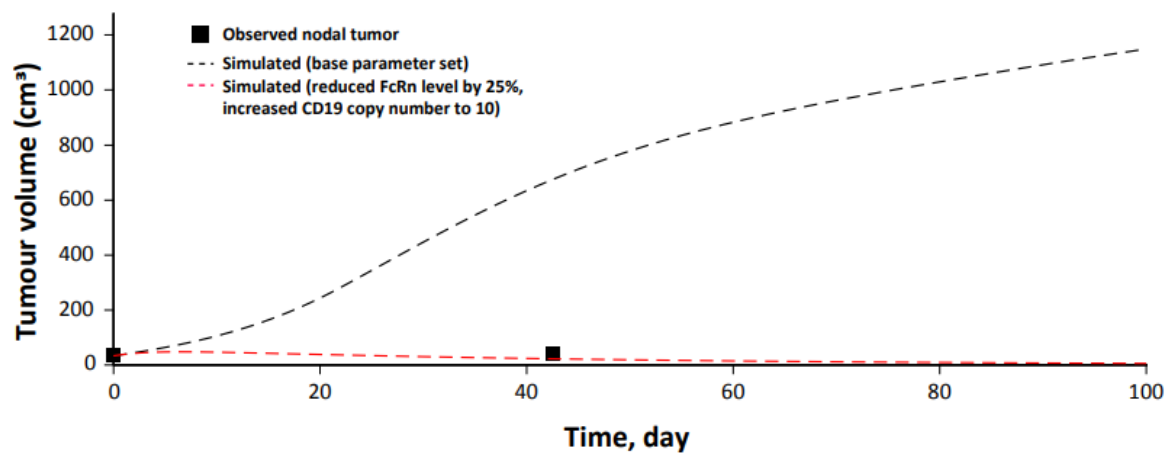

**Supplementary Fig 4.** Quantitative systems pharmacology modelling indicated that patients with hypoalbuminemia had enhanced clearance and reduced Lonca exposure, as assessed through a reduction in FcRn expression. The example patient had a body weight of 66 kg and had hypoalbuminemia; the IHC of the biopsy showed that 1% of cells were CD19 positive. FcRn, neonatal Fc receptor; IHC, immunohistochemistry; Lonca, loncastuximab tesirine-lpyl.
